# Supplementary material for: A Schematic Colorimetric Assay for Sialic Acid Assay Based on PEG-Mediated Interparticle Crosslinking Aggregation of Gold Nanoparticles
Source: Biosensors (Basel). 2023 Jan 20;13(2):164. doi: 10.3390/bios13020164 (PMC9953623; doi:10.3390/bios13020164)
Supplement: Supplementary file 1 [file biosensors-13-00164-s001.zip › biosensors-2144061-supplementary.pdf]

*Supplementary Materials*

# A schematic colorimetric assay for sialic acid assay based on PEG-mediated interparticle crosslinking aggregation of gold nanoparticles

Shixing Tang <sup>1,2,3,\*</sup>, Lin Li <sup>1,2</sup>, Rui Wang <sup>1,2</sup>, Sagar Regmi <sup>4</sup>, Xinyu Zhang <sup>2</sup>, Guoqiang Yang <sup>1,2,5,\*</sup>, and Jian Ju <sup>2,6,\*</sup>

<sup>1</sup> School of Ophthalmology & Optometry, Wenzhou Medical University, Wenzhou 325035, China

<sup>2</sup> Engineering Research Center of Clinical Functional Materials and Diagnosis & Treatment Devices of Zhejiang Province, Wenzhou Institute, University of Chinese Academy of Sciences, Wenzhou 325001, China

<sup>3</sup> Department of Epidemiology, School of Public Health, Southern Medical University, Guangzhou 510515, China

<sup>4</sup> Department of Pharmacology, School of Medicine, Case Western Reserve University, Cleveland, OH 44106, USA

<sup>5</sup> Key Laboratory of Photochemistry, Institute of Chemistry, University of Chinese Academy of Sciences, Chinese Academy of Sciences, Beijing 100190, China

<sup>6</sup> Oujiang Lab, Wenzhou 325001, China

\*Correspondence: tamgshixing@smu.edu.cn (S.T.); gqyang@iccas.ac.cn (G.Y.); jujan@ucas.ac.cn (J.J.)

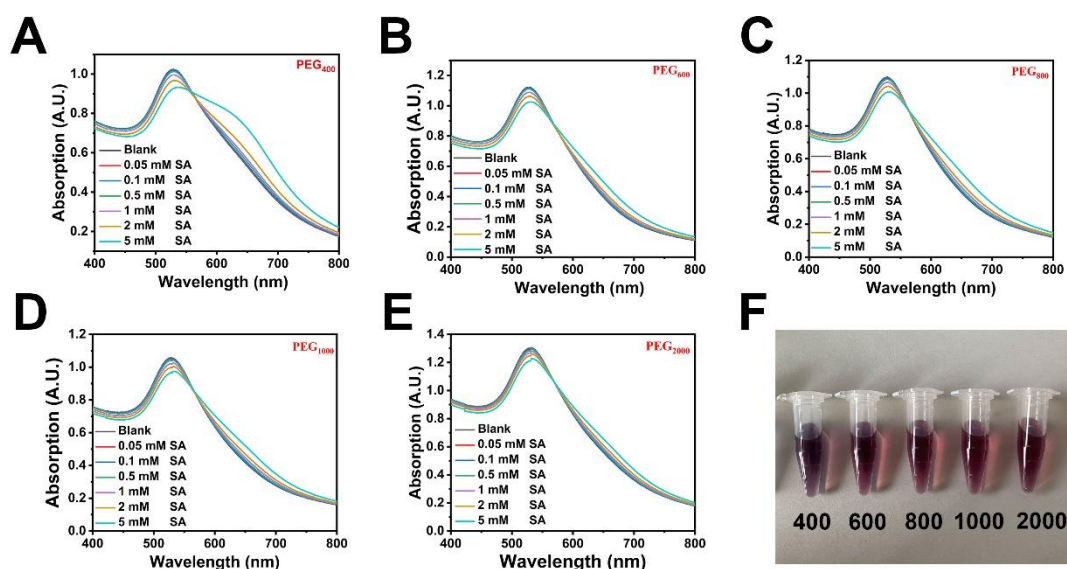

**Figure S1.** The sensing performance of the 4-MPBA-AuNPs with modified with different molecular weight (MW) type PEG. (MW: from 400 to 2000). The graph of the different type 4-MPBA-AuNPs-PEG solutions.

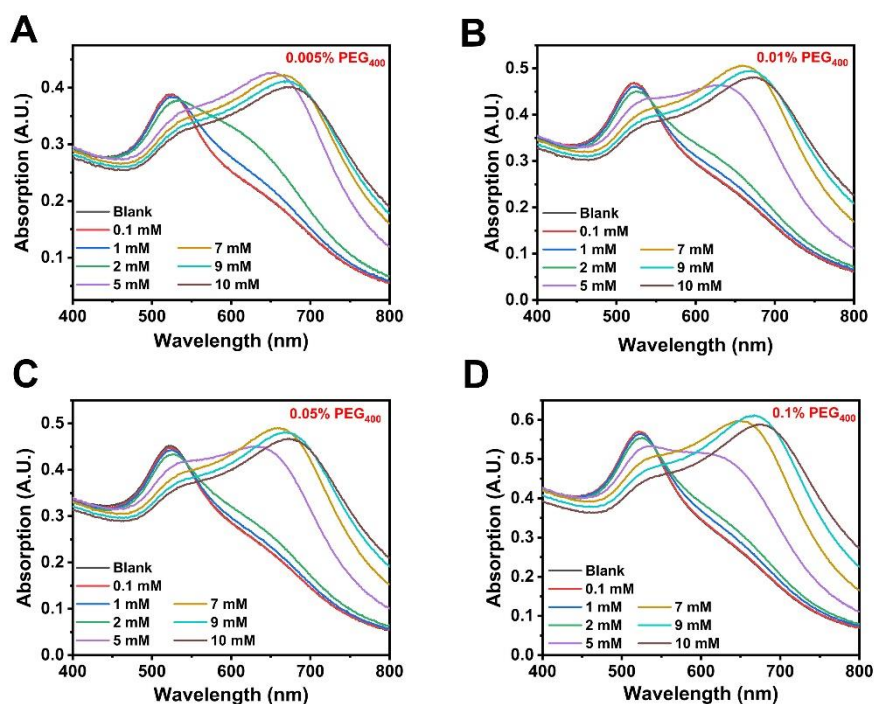

**Figure S2.** The UV-Vis spectrum of different concentrations of PEG<sub>400</sub> coated on 4-MPBA-AuNPs for the detection of SA.

**Table S1.** The sensitivity of the 4-MPBA-AuNPs coated with various concentration PEG<sub>400</sub> sensing platform for the detection of SA. ( $A_{525/660}$  vs Concentration).

|                | 0.005% | 0.01%  | 0.05%  | 0.1%   |
|----------------|--------|--------|--------|--------|
| Slope          | -0.196 | -0.206 | -0.214 | -0.216 |
| R <sup>2</sup> | 0.944  | 0.984  | 0.98   | 0.997  |

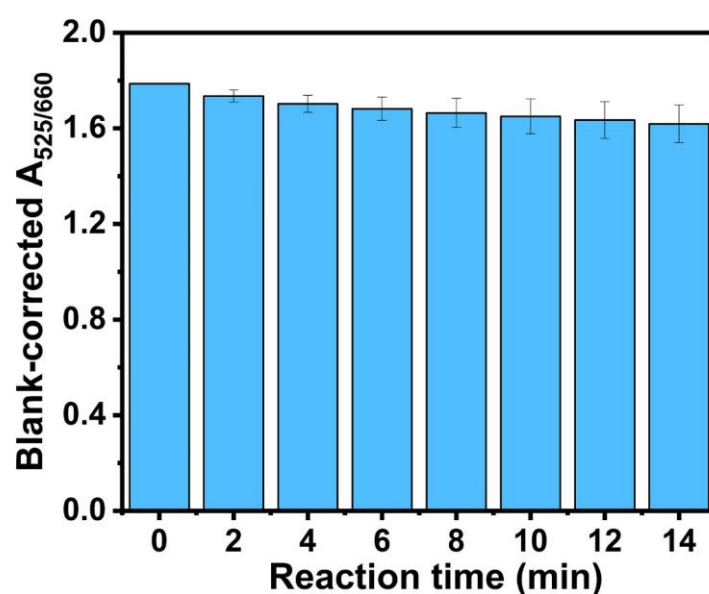

**Figure S3.** The ratio of the absorbance of 2 mM SA incubated with 4-MPBA-AuNPs@PEG<sub>400</sub> from 0 to 14 min.

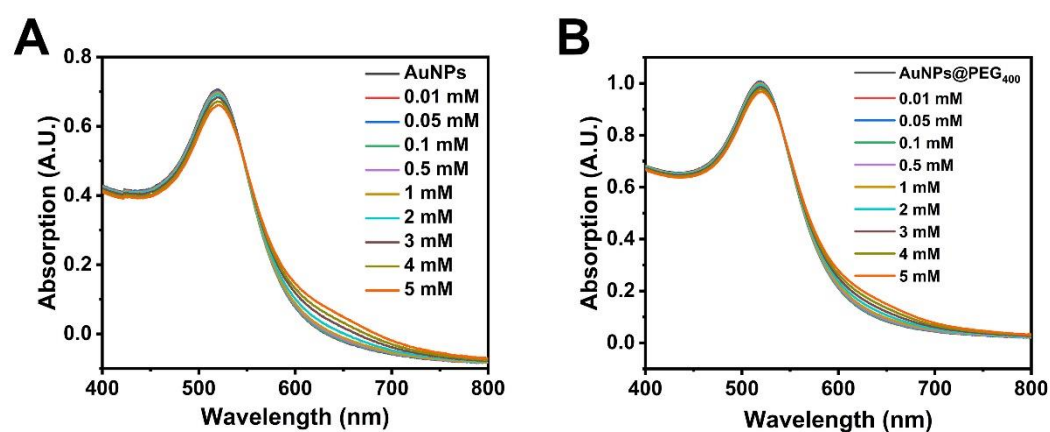

**Figure. S4.** (a) Extinction spectra of AuNPs at various SA concentrations, (b) extinction spectra of AuNPs@PEG<sub>400</sub> at various SA concentrations.

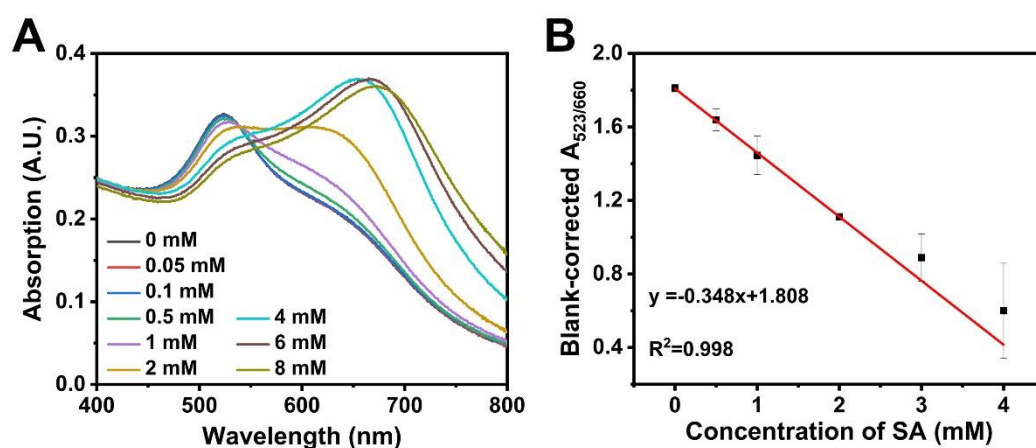

**Figure. S5.** (A) Extinction spectra of 4-MPBA-AuNPs at various SA concentrations, (B) Plot of  $A_{523/660}$  against SA concentration.

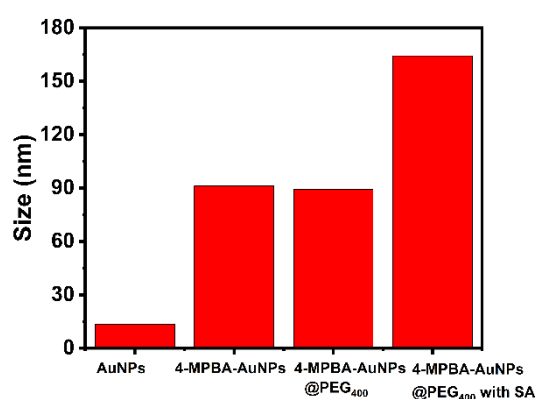

**Figure. S6.** The DLS analysis of the AuNPs, 4-MPBA-AuNPs, 4-MPBA-AuNPs@PEG<sub>400</sub> and 4-MPBA-AuNPs@PEG<sub>400</sub> mixed with SA.
